# Supplementary material for: The Combined Detection of Immune Genes for Predicting the Prognosis of Patients With Non-Small Cell Lung Cancer
Source: PubMed Central journal article supplement — Technol Cancer Res Treat. 2020 Dec 1;19:1533033820977504. doi: 10.1177/1533033820977504 (PMC7711225; doi:10.1177/1533033820977504), 2020-12-01
Supplement: Table_SI.pdf [file Table_SI.pdf]

**Table S1.** Differentially expressed immune genes of LUAD

| ID      | conMean  | treatMean | logFC    | pValue   | fdr      |
|---------|----------|-----------|----------|----------|----------|
| CD1A    | 1.512657 | 5.007731  | 1.727073 | 0.002743 | 0.003681 |
| FCER1G  | 123.0034 | 57.95699  | -1.08564 | 9.12E-22 | 6.97E-21 |
| PDIA3   | 81.90206 | 168.7709  | 1.043095 | 7.64E-25 | 8.41E-24 |
| HLA-E   | 715.5267 | 310.9272  | -1.20243 | 1.38E-29 | 3.55E-28 |
| HSPA5   | 126.0601 | 255.2033  | 1.017536 | 5.09E-29 | 1.17E-27 |
| HSPA6   | 2.628795 | 7.114711  | 1.436403 | 4.81E-06 | 8.33E-06 |
| LTA     | 0.360051 | 0.734822  | 1.029192 | 6.42E-10 | 1.56E-09 |
| PDIA2   | 0.085352 | 2.563161  | 4.908361 | 2.10E-15 | 8.43E-15 |
| HAMP    | 0.244425 | 0.640289  | 1.389332 | 6.97E-10 | 1.69E-09 |
| CAMP    | 4.229829 | 0.764149  | -2.46867 | 2.04E-29 | 5.03E-28 |
| PPBP    | 8.773011 | 2.348288  | -1.90146 | 1.27E-22 | 1.08E-21 |
| CXCL14  | 4.0955   | 87.22683  | 4.412661 | 9.19E-13 | 2.91E-12 |
| SLPI    | 1398.957 | 679.0781  | -1.0427  | 4.94E-22 | 3.91E-21 |
| CXCL10  | 16.62578 | 35.43376  | 1.091703 | 0.001579 | 0.002172 |
| CXCL9   | 14.67827 | 40.45107  | 1.462496 | 0.000543 | 0.000781 |
| CXCL12  | 14.45391 | 6.667421  | -1.11626 | 1.11E-20 | 7.54E-20 |
| CXCL13  | 8.026652 | 26.22198  | 1.707906 | 1.14E-18 | 6.29E-18 |
| CXCL2   | 122.9607 | 26.01238  | -2.24093 | 1.11E-14 | 4.17E-14 |
| PF4     | 2.190984 | 0.588709  | -1.89595 | 5.50E-20 | 3.47E-19 |
| CXCL3   | 9.594715 | 3.182348  | -1.59215 | 7.89E-11 | 2.08E-10 |
| LCN2    | 19.34002 | 133.7049  | 2.789391 | 1.34E-12 | 4.18E-12 |
| COLEC10 | 1.259905 | 0.329225  | -1.93617 | 1.15E-26 | 1.67E-25 |
| S100A12 | 5.26648  | 1.451438  | -1.85936 | 2.75E-19 | 1.62E-18 |
| MMP12   | 1.174265 | 20.82349  | 4.148381 | 4.56E-23 | 4.05E-22 |
| SFTPD   | 712.3835 | 163.1486  | -2.12647 | 2.32E-29 | 5.66E-28 |
| PTGDS   | 85.02874 | 29.19883  | -1.54204 | 1.49E-23 | 1.41E-22 |
| TMSB15A | 3.608169 | 1.320513  | -1.45017 | 4.01E-19 | 2.33E-18 |
| S100B   | 2.889576 | 7.670621  | 1.408486 | 0.000323 | 0.000475 |

|          |          |          |          |          |          |
|----------|----------|----------|----------|----------|----------|
| S100P    | 5.568695 | 190.2628 | 5.09451  | 9.47E-13 | 2.99E-12 |
| S100A7   | 0.157863 | 6.745972 | 5.41728  | 0.000119 | 0.000182 |
| PGLYRP3  | 0.011227 | 0.694647 | 5.95119  | 3.31E-19 | 1.94E-18 |
| S100A2   | 2.965653 | 31.45439 | 3.40684  | 5.93E-17 | 2.75E-16 |
| LCN12    | 0.152016 | 0.87849  | 2.530803 | 3.15E-17 | 1.50E-16 |
| PGLYRP4  | 0.050668 | 1.108632 | 4.451563 | 3.65E-19 | 2.13E-18 |
| S100A5   | 0.317072 | 1.288691 | 2.023023 | 0.001196 | 0.001666 |
| S100A3   | 8.932337 | 1.884598 | -2.24478 | 1.59E-23 | 1.49E-22 |
| COLEC12  | 18.58936 | 6.445411 | -1.52813 | 4.30E-28 | 8.00E-27 |
| S100A16  | 50.34676 | 128.6989 | 1.354029 | 5.37E-14 | 1.89E-13 |
| ZC3HAV1L | 1.023321 | 3.421774 | 1.741486 | 2.08E-26 | 2.89E-25 |
| WFDC2    | 78.40636 | 285.1798 | 1.862829 | 7.94E-14 | 2.75E-13 |
| IL6      | 26.9944  | 4.258953 | -2.66409 | 2.68E-14 | 9.68E-14 |
| UMODL1   | 0.051288 | 1.065216 | 4.376378 | 1.91E-13 | 6.42E-13 |
| MMP9     | 8.445666 | 37.58517 | 2.15388  | 7.65E-16 | 3.20E-15 |
| TLR4     | 10.64883 | 4.105359 | -1.37511 | 2.10E-26 | 2.91E-25 |
| A2M      | 597.0749 | 183.3703 | -1.70315 | 6.08E-30 | 1.68E-28 |
| PLAU     | 10.13356 | 67.75672 | 2.741223 | 1.24E-20 | 8.39E-20 |
| PAEP     | 0.294724 | 61.40471 | 7.702842 | 4.48E-14 | 1.58E-13 |
| MUC5AC   | 1.707269 | 23.8018  | 3.801309 | 0.00065  | 0.000928 |
| SFTPA2   | 7662.805 | 1313.098 | -2.5449  | 1.39E-30 | 4.66E-29 |
| LBP      | 0.139284 | 4.431405 | 4.991661 | 0.000301 | 0.000444 |
| RBP4     | 18.74764 | 5.116024 | -1.87361 | 1.14E-26 | 1.65E-25 |
| SFTPA1   | 7071.518 | 1089.224 | -2.69872 | 2.19E-32 | 1.31E-30 |
| NOX4     | 0.344121 | 0.952887 | 1.469389 | 2.16E-12 | 6.60E-12 |
| FABP7    | 0.024689 | 1.750136 | 6.147441 | 2.97E-05 | 4.80E-05 |
| FABP5    | 25.23207 | 7.736946 | -1.70542 | 7.06E-28 | 1.26E-26 |
| FABP4    | 105.6455 | 4.052759 | -4.70418 | 1.35E-35 | 1.37E-32 |
| CRABP2   | 3.403524 | 179.2632 | 5.718907 | 4.06E-29 | 9.47E-28 |

|         |          |          |          |          |          |
|---------|----------|----------|----------|----------|----------|
| CRABP1  | 0.057101 | 4.673481 | 6.354848 | 2.66E-12 | 8.06E-12 |
| DUOX1   | 27.60376 | 5.127677 | -2.42849 | 4.10E-32 | 2.12E-30 |
| RBP2    | 3.85374  | 0.61588  | -2.64554 | 8.50E-31 | 2.98E-29 |
| CETP    | 1.874524 | 0.86511  | -1.11557 | 6.88E-17 | 3.18E-16 |
| C8G     | 0.320409 | 1.125984 | 1.813201 | 1.77E-06 | 3.20E-06 |
| PI15    | 0.27782  | 1.847714 | 2.733518 | 2.58E-11 | 7.11E-11 |
| NOX1    | 0.302054 | 0.898188 | 1.572211 | 1.46E-17 | 7.17E-17 |
| CTSG    | 3.488351 | 1.069993 | -1.70494 | 6.33E-14 | 2.21E-13 |
| CYBB    | 63.4362  | 28.48505 | -1.1551  | 1.09E-17 | 5.44E-17 |
| GDF15   | 15.30221 | 46.21328 | 1.594568 | 5.75E-06 | 9.91E-06 |
| SOCS3   | 154.0915 | 60.39227 | -1.35135 | 4.25E-09 | 9.62E-09 |
| CCL20   | 10.7287  | 29.75677 | 1.471743 | 1.95E-05 | 3.20E-05 |
| IKBKE   | 2.338112 | 5.713826 | 1.289113 | 4.02E-26 | 5.38E-25 |
| ISG15   | 33.23618 | 106.8073 | 1.684184 | 6.48E-11 | 1.72E-10 |
| TFR2    | 0.085558 | 0.792223 | 3.210934 | 4.37E-33 | 3.63E-31 |
| MUC4    | 1.229496 | 7.08529  | 2.526759 | 9.91E-10 | 2.37E-09 |
| CST4    | 0.009664 | 1.674308 | 7.436763 | 1.12E-20 | 7.61E-20 |
| ITGAV   | 12.86877 | 27.55803 | 1.098598 | 2.63E-14 | 9.51E-14 |
| IL12B   | 0.123453 | 0.2663   | 1.10909  | 0.000917 | 0.001293 |
| TLR8    | 5.83755  | 1.912064 | -1.61023 | 4.60E-25 | 5.23E-24 |
| BPHL    | 1.424593 | 3.770883 | 1.404353 | 1.64E-29 | 4.13E-28 |
| FURIN   | 40.01926 | 86.84622 | 1.117769 | 0.002679 | 0.0036   |
| AHNAK   | 124.7919 | 36.48568 | -1.77412 | 6.94E-28 | 1.24E-26 |
| MX2     | 1.670704 | 5.179641 | 1.632396 | 4.05E-21 | 2.88E-20 |
| FGF2    | 2.567315 | 0.721668 | -1.83085 | 1.29E-28 | 2.70E-27 |
| F2RL1   | 4.094566 | 11.16669 | 1.447419 | 5.26E-12 | 1.55E-11 |
| MSR1    | 37.22487 | 8.463701 | -2.13691 | 5.21E-31 | 1.93E-29 |
| PDF     | 0.679124 | 1.591907 | 1.22901  | 3.95E-23 | 3.54E-22 |
| SLC11A1 | 12.84329 | 4.077155 | -1.65538 | 9.64E-26 | 1.21E-24 |

|          |          |          |          |          |          |
|----------|----------|----------|----------|----------|----------|
| DES      | 36.04134 | 5.018988 | -2.84418 | 6.00E-32 | 2.94E-30 |
| MARCO    | 216.7747 | 29.67918 | -2.86867 | 3.67E-33 | 3.20E-31 |
| TNFSF11  | 0.056618 | 1.020431 | 4.171761 | 1.24E-24 | 1.34E-23 |
| JUND     | 183.3261 | 73.62766 | -1.31609 | 2.05E-22 | 1.70E-21 |
| CLDN4    | 40.79848 | 100.5762 | 1.301701 | 2.07E-20 | 1.36E-19 |
| CCL28    | 1.549624 | 3.462145 | 1.159748 | 0.003675 | 0.004868 |
| IRF7     | 8.093505 | 21.56299 | 1.413721 | 1.57E-23 | 1.47E-22 |
| APOBEC3A | 1.735969 | 0.791345 | -1.13336 | 1.16E-11 | 3.29E-11 |
| IL7R     | 37.2444  | 10.26542 | -1.85923 | 9.88E-25 | 1.07E-23 |
| PTX3     | 5.269555 | 1.506397 | -1.80658 | 3.70E-13 | 1.21E-12 |
| MASP1    | 1.251966 | 0.213046 | -2.55496 | 3.27E-32 | 1.79E-30 |
| PROC     | 0.11738  | 2.061283 | 4.134281 | 2.57E-24 | 2.65E-23 |
| HMOX1    | 77.18324 | 27.76545 | -1.475   | 4.41E-07 | 8.42E-07 |
| ARRB1    | 22.27302 | 10.20457 | -1.12608 | 2.15E-27 | 3.49E-26 |
| PDCD1    | 0.939007 | 2.047047 | 1.124337 | 7.60E-07 | 1.42E-06 |
| PCSK1    | 0.104722 | 10.63746 | 6.666452 | 1.35E-08 | 2.93E-08 |
| ARG2     | 1.229949 | 3.050276 | 1.310341 | 1.51E-09 | 3.56E-09 |
| AQP9     | 11.84685 | 4.514153 | -1.39198 | 1.17E-19 | 7.16E-19 |
| BIRC5    | 0.806704 | 11.4556  | 3.82787  | 2.17E-32 | 1.31E-30 |
| VIM      | 320.7725 | 155.0503 | -1.04881 | 7.64E-28 | 1.35E-26 |
| OAS1     | 8.033465 | 20.1677  | 1.327952 | 3.97E-12 | 1.18E-11 |
| AGER     | 1096.032 | 37.75775 | -4.85937 | 4.08E-36 | 1.34E-32 |
| TNFSF4   | 0.525435 | 1.376967 | 1.389908 | 4.95E-13 | 1.60E-12 |
| NOS1     | 0.896052 | 0.254531 | -1.81574 | 5.51E-27 | 8.39E-26 |
| CCL14    | 2.128807 | 0.441847 | -2.26843 | 1.80E-24 | 1.90E-23 |
| CCL19    | 13.7824  | 32.76171 | 1.249183 | 3.25E-07 | 6.26E-07 |
| CCL18    | 169.8054 | 82.63113 | -1.03912 | 4.35E-06 | 7.57E-06 |
| CCL26    | 0.324017 | 0.857481 | 1.404034 | 4.81E-05 | 7.63E-05 |
| CCL22    | 2.670244 | 5.662496 | 1.084466 | 0.000922 | 0.0013   |

|          |          |          |          |          |          |
|----------|----------|----------|----------|----------|----------|
| CCR3     | 0.104468 | 0.300073 | 1.522249 | 1.28E-08 | 2.78E-08 |
| CCR8     | 0.200681 | 0.687004 | 1.775417 | 4.60E-16 | 1.97E-15 |
| CCL2     | 59.71354 | 23.98548 | -1.3159  | 8.87E-07 | 1.65E-06 |
| CCL7     | 0.324146 | 1.346088 | 2.054057 | 9.28E-11 | 2.43E-10 |
| CCL23    | 8.195078 | 1.57977  | -2.37504 | 1.51E-30 | 5.00E-29 |
| CCL25    | 0.034785 | 0.294502 | 3.081737 | 2.02E-13 | 6.76E-13 |
| CCL24    | 11.24575 | 2.317969 | -2.27845 | 2.04E-14 | 7.46E-14 |
| CDH1     | 35.97208 | 79.27525 | 1.139993 | 3.24E-21 | 2.33E-20 |
| PPARG    | 12.49131 | 4.583032 | -1.44655 | 1.03E-25 | 1.28E-24 |
| FGR      | 25.32132 | 6.639022 | -1.93131 | 5.10E-32 | 2.55E-30 |
| MIF      | 17.57731 | 44.02822 | 1.324714 | 1.23E-20 | 8.33E-20 |
| HCK      | 27.3316  | 12.18712 | -1.16521 | 1.95E-23 | 1.81E-22 |
| OLR1     | 62.38426 | 12.08486 | -2.36798 | 9.44E-32 | 4.33E-30 |
| CD79A    | 7.419555 | 22.8488  | 1.622714 | 2.82E-13 | 9.33E-13 |
| BTK      | 7.597488 | 3.267207 | -1.21746 | 2.35E-25 | 2.79E-24 |
| RAC3     | 1.863929 | 10.1597  | 2.446439 | 7.45E-25 | 8.22E-24 |
| NFATC4   | 1.961348 | 4.995465 | 1.348773 | 1.95E-17 | 9.44E-17 |
| FOS      | 309.8442 | 105.9857 | -1.54767 | 1.53E-13 | 5.18E-13 |
| CARD11   | 1.959326 | 7.582994 | 1.95241  | 3.89E-17 | 1.83E-16 |
| CD19     | 0.724399 | 1.930329 | 1.41399  | 8.28E-15 | 3.14E-14 |
| PIK3R5   | 4.384152 | 2.138122 | -1.03595 | 1.26E-19 | 7.68E-19 |
| LILRB3   | 3.016601 | 1.304584 | -1.20933 | 4.52E-24 | 4.53E-23 |
| IFITM1   | 55.91203 | 131.0799 | 1.229215 | 5.37E-09 | 1.21E-08 |
| IGHA1    | 848.4298 | 3365.107 | 1.987785 | 7.19E-09 | 1.60E-08 |
| IGHA2    | 73.81708 | 342.4178 | 2.213731 | 3.22E-10 | 8.04E-10 |
| IGHD     | 19.95455 | 63.98675 | 1.681055 | 0.001402 | 0.001939 |
| IGHD2-2  | 0.368431 | 2.098522 | 2.509907 | 2.73E-07 | 5.31E-07 |
| IGHD3-22 | 0.152803 | 1.981798 | 3.697065 | 1.61E-10 | 4.13E-10 |
| IGHD3-3  | 0.883972 | 5.668961 | 2.681012 | 3.05E-08 | 6.41E-08 |

|          |          |          |          |          |          |
|----------|----------|----------|----------|----------|----------|
| IGHD3-9  | 0.670019 | 2.966403 | 2.14644  | 5.86E-08 | 1.20E-07 |
| IGHD6-25 | 0.536714 | 2.075724 | 1.951388 | 7.44E-06 | 1.27E-05 |
| IGHG1    | 131.9776 | 1265.158 | 3.260953 | 1.36E-18 | 7.45E-18 |
| IGHG2    | 102.921  | 677.4291 | 2.718532 | 1.04E-17 | 5.20E-17 |
| IGHG3    | 57.26278 | 430.3605 | 2.909876 | 1.50E-16 | 6.72E-16 |
| IGHG4    | 25.37554 | 402.6325 | 3.987953 | 9.10E-23 | 7.82E-22 |
| IGHJ1    | 1.11008  | 9.789636 | 3.140592 | 8.97E-12 | 2.59E-11 |
| IGHJ2    | 4.003599 | 28.03016 | 2.80761  | 5.03E-13 | 1.63E-12 |
| IGHJ3    | 11.28338 | 55.18624 | 2.290109 | 1.83E-13 | 6.16E-13 |
| IGHM     | 171.6828 | 490.9693 | 1.515888 | 1.85E-09 | 4.33E-09 |
| IGHV1-18 | 41.0351  | 264.7819 | 2.689874 | 6.40E-13 | 2.05E-12 |
| IGHV1-2  | 17.40416 | 125.4854 | 2.850015 | 4.41E-11 | 1.19E-10 |
| IGHV1-24 | 10.49944 | 127.0886 | 3.597451 | 4.12E-15 | 1.61E-14 |
| IGHV1-3  | 0.90465  | 8.613894 | 3.251235 | 2.48E-09 | 5.74E-09 |
| IGHV1-45 | 1.890683 | 9.081684 | 2.264053 | 3.20E-06 | 5.65E-06 |
| IGHV1-46 | 10.73217 | 81.45575 | 2.924075 | 1.19E-14 | 4.43E-14 |
| IGHV1-58 | 2.10488  | 19.50887 | 3.21232  | 5.26E-11 | 1.41E-10 |
| IGHV1-69 | 6.82612  | 46.95106 | 2.78202  | 9.09E-11 | 2.38E-10 |
| IGHV2-26 | 5.176644 | 42.26842 | 3.029491 | 8.24E-12 | 2.38E-11 |
| IGHV2-5  | 4.374248 | 30.18158 | 2.786561 | 4.30E-11 | 1.16E-10 |
| IGHV2-70 | 5.983552 | 38.29204 | 2.67797  | 1.21E-10 | 3.13E-10 |
| IGHV3-11 | 18.82959 | 117.6851 | 2.643858 | 1.32E-12 | 4.11E-12 |
| IGHV3-13 | 6.06941  | 28.50151 | 2.23141  | 2.33E-07 | 4.55E-07 |
| IGHV3-15 | 25.4948  | 166.46   | 2.706901 | 8.72E-13 | 2.77E-12 |
| IGHV3-16 | 0.07908  | 0.361266 | 2.191681 | 2.32E-06 | 4.15E-06 |
| IGHV3-20 | 1.677003 | 10.11457 | 2.592477 | 2.92E-10 | 7.31E-10 |
| IGHV3-21 | 29.32306 | 152.6826 | 2.380428 | 1.02E-12 | 3.22E-12 |
| IGHV3-23 | 54.59584 | 349.2407 | 2.677359 | 4.66E-15 | 1.81E-14 |
| IGHV3-30 | 24.88145 | 140.2663 | 2.495026 | 1.12E-12 | 3.51E-12 |

|          |          |          |          |          |          |
|----------|----------|----------|----------|----------|----------|
| IGHV3-33 | 11.0155  | 90.95008 | 3.045541 | 1.80E-14 | 6.62E-14 |
| IGHV3-35 | 0.560196 | 3.527567 | 2.654669 | 1.07E-11 | 3.06E-11 |
| IGHV3-38 | 0.642836 | 1.967296 | 1.613691 | 1.24E-09 | 2.94E-09 |
| IGHV3-43 | 2.647764 | 24.61975 | 3.216969 | 6.45E-14 | 2.25E-13 |
| IGHV3-48 | 6.238151 | 37.65809 | 2.59377  | 1.34E-11 | 3.78E-11 |
| IGHV3-49 | 14.12118 | 78.14365 | 2.468268 | 4.88E-10 | 1.20E-09 |
| IGHV3-53 | 4.649353 | 29.29107 | 2.655359 | 2.07E-13 | 6.91E-13 |
| IGHV3-64 | 1.34586  | 11.87719 | 3.141593 | 7.07E-10 | 1.71E-09 |
| IGHV3-66 | 2.984488 | 17.43677 | 2.546577 | 4.29E-12 | 1.27E-11 |
| IGHV3-7  | 2.124515 | 10.35736 | 2.285451 | 3.92E-10 | 9.69E-10 |
| IGHV3-72 | 6.299688 | 26.01584 | 2.046038 | 9.65E-08 | 1.94E-07 |
| IGHV3-73 | 10.38621 | 81.32884 | 2.969097 | 6.91E-10 | 1.68E-09 |
| IGHV3-74 | 21.73801 | 79.35452 | 1.868092 | 9.81E-11 | 2.57E-10 |
| IGHV4-28 | 3.468571 | 19.35813 | 2.480526 | 4.95E-13 | 1.60E-12 |
| IGHV4-31 | 10.45326 | 57.24995 | 2.453321 | 5.27E-10 | 1.29E-09 |
| IGHV4-34 | 18.1825  | 135.3323 | 2.895883 | 4.81E-15 | 1.86E-14 |
| IGHV4-39 | 39.12692 | 237.6891 | 2.602842 | 1.54E-13 | 5.21E-13 |
| IGHV4-4  | 1.570062 | 12.79237 | 3.02639  | 1.22E-10 | 3.18E-10 |
| IGHV4-59 | 30.38602 | 143.4355 | 2.238922 | 1.68E-11 | 4.72E-11 |
| IGHV4-61 | 2.578483 | 16.51845 | 2.679484 | 6.31E-11 | 1.68E-10 |
| IGHV5-51 | 43.41771 | 308.4392 | 2.82863  | 1.07E-13 | 3.66E-13 |
| IGHV6-1  | 1.865011 | 8.606853 | 2.206302 | 1.37E-09 | 3.24E-09 |
| IGHV7-81 | 0.301553 | 2.280449 | 2.918837 | 2.31E-19 | 1.37E-18 |
| IGKC     | 273.1894 | 1874.168 | 2.778277 | 3.71E-16 | 1.60E-15 |
| IGKJ5    | 2.159712 | 18.53242 | 3.10114  | 3.49E-17 | 1.65E-16 |
| IGKV1-12 | 2.520261 | 10.26025 | 2.025421 | 3.47E-08 | 7.26E-08 |
| IGKV1-13 | 0.143389 | 1.831607 | 3.675101 | 7.05E-11 | 1.87E-10 |
| IGKV1-16 | 15.80031 | 112.9486 | 2.837642 | 1.03E-10 | 2.69E-10 |
| IGKV1-17 | 13.84206 | 84.82253 | 2.615389 | 1.02E-11 | 2.92E-11 |

|           |          |          |          |          |          |
|-----------|----------|----------|----------|----------|----------|
| IGKV1-27  | 13.73133 | 74.87728 | 2.447057 | 1.79E-09 | 4.19E-09 |
| IGKV1-33  | 0.195072 | 3.589214 | 4.201589 | 2.38E-16 | 1.05E-15 |
| IGKV1-37  | 0.034142 | 0.28538  | 3.063257 | 1.37E-08 | 2.95E-08 |
| IGKV1-39  | 1.049658 | 8.542115 | 3.024674 | 1.93E-12 | 5.94E-12 |
| IGKV1-5   | 60.44539 | 428.844  | 2.826749 | 7.70E-14 | 2.67E-13 |
| IGKV1-6   | 13.33896 | 63.21951 | 2.244724 | 6.31E-11 | 1.68E-10 |
| IGKV1-8   | 3.576514 | 12.65597 | 1.823192 | 1.58E-13 | 5.33E-13 |
| IGKV1-9   | 18.14235 | 115.0727 | 2.665113 | 1.05E-12 | 3.31E-12 |
| IGKV1D-12 | 0.51859  | 3.728448 | 2.845909 | 5.56E-10 | 1.36E-09 |
| IGKV1D-13 | 2.161473 | 9.670054 | 2.161509 | 3.06E-06 | 5.40E-06 |
| IGKV1D-16 | 1.941349 | 17.12622 | 3.141075 | 4.54E-09 | 1.03E-08 |
| IGKV1D-17 | 0.749201 | 4.893747 | 2.707515 | 1.21E-06 | 2.21E-06 |
| IGKV1D-33 | 0.100057 | 2.070185 | 4.370867 | 1.42E-11 | 4.00E-11 |
| IGKV1D-39 | 0.54237  | 4.832988 | 3.155567 | 1.58E-11 | 4.43E-11 |
| IGKV1D-42 | 0.884335 | 3.089447 | 1.804683 | 1.12E-07 | 2.24E-07 |
| IGKV1D-43 | 0.459502 | 2.34391  | 2.350773 | 4.79E-08 | 9.92E-08 |
| IGKV1D-8  | 1.414228 | 7.496351 | 2.406174 | 1.97E-11 | 5.49E-11 |
| IGKV2-24  | 13.2721  | 55.54037 | 2.06514  | 1.81E-07 | 3.57E-07 |
| IGKV2-28  | 0.501846 | 3.694007 | 2.87987  | 2.04E-10 | 5.17E-10 |
| IGKV2-30  | 2.590276 | 12.77001 | 2.301582 | 1.26E-07 | 2.52E-07 |
| IGKV2-40  | 0.006605 | 0.337278 | 5.674258 | 1.06E-09 | 2.54E-09 |
| IGKV2D-24 | 0.88374  | 3.423431 | 1.953749 | 1.96E-07 | 3.84E-07 |
| IGKV2D-28 | 0.097108 | 1.777607 | 4.194202 | 1.69E-09 | 3.96E-09 |
| IGKV2D-29 | 4.78396  | 31.45851 | 2.717173 | 2.51E-09 | 5.81E-09 |
| IGKV2D-30 | 0.324762 | 1.814854 | 2.482399 | 2.73E-06 | 4.83E-06 |
| IGKV2D-40 | 1.808666 | 15.04103 | 3.055905 | 1.95E-10 | 4.94E-10 |
| IGKV3-11  | 56.68386 | 351.6676 | 2.633202 | 4.42E-15 | 1.72E-14 |
| IGKV3-15  | 21.56139 | 164.3741 | 2.930461 | 1.56E-16 | 6.99E-16 |
| IGKV3-20  | 123.1973 | 663.033  | 2.42811  | 8.74E-14 | 3.02E-13 |



|           |          |          |          |          |          |
|-----------|----------|----------|----------|----------|----------|
| IGKV3-7   | 1.506538 | 9.172461 | 2.606072 | 2.04E-13 | 6.83E-13 |
| IGKV3D-11 | 1.397143 | 8.548336 | 2.613164 | 6.18E-13 | 1.99E-12 |
| IGKV3D-15 | 1.440703 | 12.92814 | 3.165671 | 2.70E-14 | 9.74E-14 |
| IGKV3D-20 | 4.630188 | 26.82269 | 2.534311 | 4.40E-12 | 1.30E-11 |
| IGKV3D-7  | 0.081928 | 1.038865 | 3.664511 | 2.27E-10 | 5.74E-10 |
| IGKV4-1   | 73.55172 | 579.176  | 2.977171 | 3.32E-15 | 1.31E-14 |
| IGKV5-2   | 1.73097  | 12.83174 | 2.890064 | 6.81E-09 | 1.51E-08 |
| IGKV6-21  | 3.022475 | 21.03627 | 2.799076 | 1.52E-09 | 3.58E-09 |
| IGKV6D-21 | 1.30141  | 6.554375 | 2.332383 | 4.52E-07 | 8.62E-07 |
| IGKV6D-41 | 0.055373 | 0.709937 | 3.680431 | 2.75E-06 | 4.88E-06 |
| IGLC2     | 195.5028 | 906.0894 | 2.212464 | 3.39E-14 | 1.21E-13 |
| IGLC3     | 111.8047 | 604.1114 | 2.433833 | 7.59E-13 | 2.42E-12 |
| IGLC6     | 0.928882 | 3.119214 | 1.747615 | 4.65E-12 | 1.37E-11 |
| IGLC7     | 7.215533 | 29.91215 | 2.051554 | 4.92E-07 | 9.34E-07 |
| IGLJ1     | 0.166583 | 1.009982 | 2.60002  | 1.27E-10 | 3.30E-10 |
| IGLJ2     | 0.469105 | 2.13098  | 2.183535 | 6.48E-13 | 2.08E-12 |
| IGLJ3     | 0.098529 | 0.56724  | 2.525333 | 9.25E-09 | 2.03E-08 |
| IGLV1-36  | 4.578316 | 39.19559 | 3.097802 | 4.78E-08 | 9.88E-08 |
| IGLV1-40  | 54.14012 | 353.2123 | 2.705766 | 2.80E-14 | 1.01E-13 |
| IGLV1-44  | 63.68446 | 217.8073 | 1.774039 | 2.65E-10 | 6.66E-10 |
| IGLV1-47  | 31.33337 | 174.0315 | 2.473577 | 2.87E-12 | 8.68E-12 |
| IGLV1-50  | 0.469057 | 2.93315  | 2.644615 | 3.79E-11 | 1.03E-10 |
| IGLV1-51  | 72.95113 | 295.515  | 2.018229 | 7.09E-12 | 2.06E-11 |
| IGLV10-54 | 6.297316 | 26.55781 | 2.076327 | 0.000156 | 0.000237 |
| IGLV2-11  | 39.81979 | 176.8498 | 2.150967 | 8.96E-10 | 2.15E-09 |
| IGLV2-14  | 63.06866 | 382.6945 | 2.601198 | 2.38E-12 | 7.25E-12 |
| IGLV2-18  | 3.78253  | 19.43953 | 2.36157  | 4.30E-08 | 8.91E-08 |
| IGLV2-23  | 51.5336  | 292.407  | 2.504393 | 1.04E-11 | 2.98E-11 |
| IGLV2-33  | 0.150127 | 0.967266 | 2.687728 | 1.29E-09 | 3.07E-09 |

|          |          |          |          |          |          |
|----------|----------|----------|----------|----------|----------|
| IGLV2-8  | 13.44129 | 79.62083 | 2.566475 | 8.87E-11 | 2.33E-10 |
| IGLV3-1  | 27.93424 | 166.9579 | 2.579378 | 1.15E-12 | 3.59E-12 |
| IGLV3-10 | 20.16926 | 128.9178 | 2.676221 | 1.17E-09 | 2.78E-09 |
| IGLV3-12 | 0.338308 | 3.04334  | 3.169247 | 2.58E-12 | 7.84E-12 |
| IGLV3-16 | 1.902871 | 5.468889 | 1.52307  | 1.09E-08 | 2.38E-08 |
| IGLV3-19 | 53.65556 | 356.8314 | 2.733443 | 1.63E-12 | 5.04E-12 |
| IGLV3-21 | 37.69806 | 300.4172 | 2.994405 | 8.77E-15 | 3.31E-14 |
| IGLV3-25 | 93.51506 | 270.341  | 1.53151  | 1.37E-10 | 3.53E-10 |
| IGLV3-27 | 7.768914 | 43.48264 | 2.484655 | 6.34E-07 | 1.19E-06 |
| IGLV3-32 | 0.041392 | 0.371054 | 3.164188 | 1.49E-10 | 3.82E-10 |
| IGLV3-9  | 6.871343 | 44.49954 | 2.695126 | 3.11E-14 | 1.12E-13 |
| IGLV4-3  | 0.533411 | 2.159644 | 2.017473 | 5.25E-06 | 9.07E-06 |
| IGLV4-60 | 3.34598  | 21.62681 | 2.69232  | 8.98E-07 | 1.66E-06 |
| IGLV4-69 | 14.3247  | 103.697  | 2.855798 | 1.81E-11 | 5.05E-11 |
| IGLV5-37 | 0.808278 | 6.42214  | 2.99013  | 1.54E-06 | 2.79E-06 |
| IGLV5-45 | 4.613155 | 27.12389 | 2.555738 | 3.52E-08 | 7.36E-08 |
| IGLV5-48 | 0.286093 | 1.869827 | 2.708346 | 7.45E-08 | 1.51E-07 |
| IGLV5-52 | 0.207758 | 0.725725 | 1.804517 | 2.14E-05 | 3.50E-05 |
| IGLV6-57 | 17.9916  | 124.6806 | 2.792841 | 8.93E-13 | 2.83E-12 |
| IGLV7-43 | 6.82644  | 32.5216  | 2.252193 | 2.21E-08 | 4.70E-08 |
| IGLV7-46 | 8.816455 | 38.62859 | 2.131398 | 1.26E-08 | 2.74E-08 |
| IGLV8-61 | 16.61476 | 76.23481 | 2.197984 | 1.02E-06 | 1.88E-06 |
| IGLV9-49 | 4.62506  | 38.5641  | 3.059715 | 1.13E-06 | 2.08E-06 |
| CMA1     | 0.774337 | 0.25776  | -1.58693 | 2.31E-12 | 7.03E-12 |
| CYR61    | 219.9205 | 78.81089 | -1.48052 | 1.89E-18 | 1.02E-17 |
| EDN1     | 47.06019 | 13.16776 | -1.8375  | 2.09E-22 | 1.72E-21 |
| EDN2     | 1.094524 | 4.620958 | 2.077889 | 4.23E-09 | 9.58E-09 |
| FGF10    | 1.030552 | 0.155689 | -2.72668 | 9.52E-32 | 4.35E-30 |
| PROK2    | 0.703308 | 0.192465 | -1.86956 | 8.84E-15 | 3.34E-14 |

|         |          |          |          |          |          |
|---------|----------|----------|----------|----------|----------|
| SAA1    | 6.481858 | 26.28613 | 2.019823 | 0.00034  | 0.000499 |
| SAA2    | 1.099715 | 3.705003 | 1.752345 | 2.10E-05 | 3.44E-05 |
| SEMA3A  | 0.764707 | 2.87094  | 1.908544 | 0.000204 | 0.000305 |
| SEMA3B  | 18.93285 | 7.015993 | -1.43217 | 4.48E-23 | 4.00E-22 |
| SEMA3D  | 1.100682 | 0.53795  | -1.03285 | 2.78E-17 | 1.33E-16 |
| SEMA3G  | 15.11747 | 1.780952 | -3.0855  | 4.55E-32 | 2.32E-30 |
| SEMA4B  | 9.352985 | 30.9975  | 1.728653 | 1.86E-25 | 2.24E-24 |
| SEMA4C  | 5.884484 | 11.98607 | 1.026371 | 1.56E-19 | 9.40E-19 |
| SEMA5A  | 10.83931 | 2.097462 | -2.36956 | 4.32E-31 | 1.65E-29 |
| SEMA6A  | 4.611716 | 0.87783  | -2.39329 | 1.42E-30 | 4.73E-29 |
| SEMA6D  | 2.862559 | 0.774092 | -1.88673 | 1.91E-26 | 2.66E-25 |
| SEMA7A  | 2.368737 | 5.125549 | 1.113588 | 5.99E-06 | 1.03E-05 |
| SLIT2   | 13.11457 | 2.626408 | -2.32001 | 7.11E-32 | 3.42E-30 |
| TNC     | 11.52425 | 38.07029 | 1.723992 | 6.61E-06 | 1.13E-05 |
| C5AR1   | 32.14265 | 9.266557 | -1.79438 | 3.00E-30 | 9.11E-29 |
| CCRL2   | 7.053489 | 2.660242 | -1.40678 | 5.33E-27 | 8.12E-26 |
| CX3CR1  | 3.997153 | 1.461474 | -1.45155 | 9.14E-17 | 4.17E-16 |
| EDNRB   | 34.73589 | 3.42807  | -3.34096 | 4.13E-35 | 1.90E-32 |
| FPR1    | 18.99579 | 5.684836 | -1.74049 | 2.37E-21 | 1.73E-20 |
| FPR2    | 6.190164 | 0.930407 | -2.73404 | 5.81E-30 | 1.62E-28 |
| GPR17   | 0.950787 | 0.265354 | -1.8412  | 2.20E-23 | 2.03E-22 |
| PLXNA3  | 2.946945 | 6.62178  | 1.167999 | 2.79E-16 | 1.22E-15 |
| PLXNB3  | 0.308534 | 3.525339 | 3.514261 | 1.73E-22 | 1.44E-21 |
| ROBO2   | 1.424084 | 0.550955 | -1.37003 | 6.19E-22 | 4.82E-21 |
| ADM2    | 0.356743 | 4.354823 | 3.609658 | 2.97E-33 | 2.71E-31 |
| AGRP    | 4.688615 | 0.67612  | -2.79381 | 2.49E-30 | 7.76E-29 |
| AGT     | 1.646394 | 15.75875 | 3.258771 | 5.98E-08 | 1.23E-07 |
| ANGPTL7 | 1.450445 | 0.162524 | -3.15777 | 1.59E-31 | 6.83E-30 |
| APLN    | 12.10702 | 4.227025 | -1.51813 | 2.76E-15 | 1.09E-14 |

|       |          |          |          |          |          |
|-------|----------|----------|----------|----------|----------|
| ARTN  | 0.1474   | 1.064609 | 2.852516 | 3.05E-20 | 1.98E-19 |
| BDNF  | 1.412052 | 0.308034 | -2.19663 | 4.34E-28 | 8.04E-27 |
| BMP2  | 22.65256 | 7.36702  | -1.62052 | 1.39E-23 | 1.32E-22 |
| BMP8A | 0.166142 | 0.935771 | 2.493736 | 1.05E-23 | 1.01E-22 |
| BMP8B | 0.70731  | 1.846432 | 1.384325 | 6.60E-18 | 3.36E-17 |
| CALCB | 0.01692  | 0.354508 | 4.388987 | 7.08E-05 | 0.000111 |
| CAT   | 100.3874 | 29.61703 | -1.76108 | 1.95E-35 | 1.40E-32 |
| CD70  | 0.333924 | 0.865164 | 1.373451 | 1.69E-05 | 2.80E-05 |
| CGA   | 0.012661 | 6.373583 | 8.975557 | 2.85E-06 | 5.04E-06 |
| CHGB  | 0.178818 | 10.72121 | 5.905829 | 0.002998 | 0.004009 |
| CLCF1 | 4.937565 | 10.35771 | 1.068834 | 2.41E-12 | 7.32E-12 |
| CMTM1 | 0.374649 | 0.936498 | 1.321737 | 3.44E-20 | 2.22E-19 |
| CMTM2 | 1.465564 | 0.336865 | -2.12121 | 4.68E-26 | 6.20E-25 |
| CORT  | 0.10951  | 0.223024 | 1.026134 | 1.00E-08 | 2.20E-08 |
| CSF3  | 28.53875 | 1.32025  | -4.43404 | 1.16E-18 | 6.42E-18 |
| CTGF  | 235.774  | 85.93369 | -1.45611 | 2.96E-20 | 1.93E-19 |
| EGF   | 0.341358 | 1.796843 | 2.396107 | 1.41E-13 | 4.78E-13 |
| FAM3C | 8.524795 | 22.00807 | 1.368296 | 5.59E-22 | 4.38E-21 |
| FGF11 | 0.022392 | 0.228467 | 3.350951 | 1.88E-26 | 2.62E-25 |
| FGF14 | 0.597798 | 0.292548 | -1.03098 | 1.07E-14 | 4.02E-14 |
| FGF19 | 0.001242 | 1.144493 | 9.848093 | 2.32E-16 | 1.02E-15 |
| GAL   | 0.065681 | 2.796339 | 5.41192  | 9.03E-18 | 4.55E-17 |
| GDF10 | 11.55085 | 1.429492 | -3.01443 | 5.40E-33 | 4.26E-31 |
| GDNF  | 0.027791 | 0.244227 | 3.135551 | 1.06E-13 | 3.62E-13 |
| GMFG  | 39.01317 | 15.554   | -1.32668 | 2.31E-28 | 4.57E-27 |
| GPI   | 18.00716 | 42.69694 | 1.245562 | 1.37E-28 | 2.83E-27 |
| GREM1 | 0.131946 | 4.714221 | 5.158999 | 2.67E-28 | 5.20E-27 |
| HBEGF | 49.23505 | 9.127159 | -2.43145 | 1.38E-29 | 3.55E-28 |
| HDGF  | 50.97308 | 113.0334 | 1.148942 | 6.55E-29 | 1.46E-27 |

|        |          |          |          |          |          |
|--------|----------|----------|----------|----------|----------|
| IL11   | 0.095134 | 0.71728  | 2.914496 | 7.05E-21 | 4.89E-20 |
| IL17C  | 0.03117  | 0.665376 | 4.415957 | 2.12E-16 | 9.35E-16 |
| IL17D  | 1.185325 | 0.432553 | -1.45434 | 1.87E-28 | 3.73E-27 |
| IL23A  | 0.543311 | 2.612149 | 2.265386 | 1.41E-25 | 1.72E-24 |
| IL33   | 34.45373 | 9.201808 | -1.90467 | 2.04E-29 | 5.03E-28 |
| IL34   | 4.524821 | 2.06875  | -1.1291  | 2.11E-21 | 1.55E-20 |
| INHA   | 0.0866   | 6.965935 | 6.329806 | 6.79E-16 | 2.86E-15 |
| INHBB  | 4.473434 | 10.35193 | 1.210446 | 0.00024  | 0.000357 |
| INHBE  | 0.068631 | 0.334642 | 2.285685 | 0.000148 | 0.000225 |
| INSL3  | 0.111189 | 0.508627 | 2.1936   | 9.41E-24 | 9.11E-23 |
| INSL4  | 0.008365 | 2.662633 | 8.314279 | 1.09E-05 | 1.84E-05 |
| KL     | 3.741415 | 0.827148 | -2.17737 | 4.92E-31 | 1.83E-29 |
| LEFTY2 | 1.54677  | 0.463353 | -1.73907 | 2.97E-22 | 2.41E-21 |
| LHB    | 0.095017 | 0.461668 | 2.280602 | 3.56E-16 | 1.54E-15 |
| LTBP4  | 54.0211  | 12.81445 | -2.07575 | 4.65E-31 | 1.75E-29 |
| MDK    | 16.85298 | 152.947  | 3.181956 | 4.49E-30 | 1.31E-28 |
| NDP    | 0.081567 | 0.835803 | 3.357104 | 0.000852 | 0.001205 |
| NRG1   | 1.009734 | 0.385504 | -1.38916 | 1.05E-25 | 1.30E-24 |
| OGN    | 9.407155 | 2.380192 | -1.98268 | 1.25E-24 | 1.34E-23 |
| OXT    | 0.084438 | 0.393143 | 2.219083 | 5.31E-05 | 8.39E-05 |
| PDGFB  | 16.21705 | 6.406811 | -1.33983 | 2.92E-21 | 2.11E-20 |
| PDGFRL | 2.442655 | 7.366386 | 1.592507 | 6.34E-17 | 2.94E-16 |
| PGF    | 0.793966 | 2.314486 | 1.543544 | 1.31E-15 | 5.38E-15 |
| PNOC   | 0.284506 | 0.899527 | 1.660708 | 5.23E-12 | 1.54E-11 |
| PTHLH  | 0.302626 | 2.21365  | 2.870819 | 1.08E-10 | 2.83E-10 |
| RETN   | 28.16356 | 4.006318 | -2.81348 | 6.02E-30 | 1.68E-28 |
| RLN3   | 0.070728 | 0.483759 | 2.773938 | 1.52E-07 | 3.02E-07 |
| SCT    | 0.583904 | 1.284634 | 1.137553 | 8.54E-06 | 1.45E-05 |
| SPP1   | 9.26432  | 288.484  | 4.960662 | 2.02E-30 | 6.45E-29 |

|         |          |          |          |          |          |
|---------|----------|----------|----------|----------|----------|
| TGFA    | 3.012569 | 8.889686 | 1.561138 | 1.43E-13 | 4.83E-13 |
| THPO    | 0.151484 | 1.366851 | 3.173614 | 5.55E-07 | 1.05E-06 |
| TNFSF12 | 29.693   | 14.1527  | -1.06905 | 1.09E-30 | 3.72E-29 |
| TNFSF13 | 20.37976 | 9.728411 | -1.06686 | 1.49E-28 | 3.06E-27 |
| UCN     | 0.532874 | 1.545471 | 1.536181 | 2.44E-12 | 7.40E-12 |
| UCN2    | 0.019725 | 0.364771 | 4.208899 | 2.00E-18 | 1.07E-17 |
| VGf     | 0.038337 | 2.473862 | 6.011878 | 2.41E-21 | 1.75E-20 |
| ACVRL1  | 35.97117 | 6.714144 | -2.42157 | 1.97E-34 | 4.35E-32 |
| ADRB1   | 10.99533 | 1.421175 | -2.95173 | 2.25E-32 | 1.34E-30 |
| ADRB2   | 12.79609 | 1.714631 | -2.89973 | 1.22E-35 | 1.37E-32 |
| AGTR1   | 2.258445 | 0.711429 | -1.66654 | 8.88E-28 | 1.55E-26 |
| AGTR2   | 12.89538 | 2.667769 | -2.27315 | 6.63E-26 | 8.58E-25 |
| ANGPT1  | 7.551169 | 1.782536 | -2.08277 | 5.35E-30 | 1.53E-28 |
| ANGPT4  | 1.583688 | 0.095917 | -4.04536 | 1.09E-33 | 1.26E-31 |
| ANGPTL1 | 3.948109 | 0.953699 | -2.04956 | 3.84E-30 | 1.14E-28 |
| ANGPTL4 | 7.903415 | 23.79498 | 1.590109 | 3.12E-08 | 6.55E-08 |
| APLNR   | 9.787106 | 3.81144  | -1.36055 | 8.73E-11 | 2.29E-10 |
| AVPR2   | 1.234203 | 0.358547 | -1.78335 | 1.39E-27 | 2.34E-26 |
| BMPR2   | 21.55282 | 9.606106 | -1.16585 | 1.28E-25 | 1.58E-24 |
| CALCRL  | 33.98864 | 5.579716 | -2.60679 | 2.52E-33 | 2.43E-31 |
| CNTFR   | 1.343903 | 0.28426  | -2.24115 | 1.71E-26 | 2.40E-25 |
| CRIM1   | 29.18136 | 12.78886 | -1.19016 | 5.10E-26 | 6.71E-25 |
| CRLF1   | 2.782904 | 47.79736 | 4.102268 | 1.74E-06 | 3.14E-06 |
| ENG     | 107.3439 | 38.43001 | -1.48194 | 4.41E-29 | 1.02E-27 |
| FGFR2   | 11.32281 | 3.679554 | -1.62163 | 5.42E-28 | 9.89E-27 |
| FGFR4   | 16.10981 | 3.229638 | -2.3185  | 1.38E-30 | 4.62E-29 |
| FLT4    | 5.512186 | 2.359697 | -1.22402 | 1.75E-20 | 1.16E-19 |
| GALR2   | 0.054952 | 0.294528 | 2.422153 | 3.46E-10 | 8.61E-10 |
| GHR     | 1.403242 | 0.393606 | -1.83394 | 6.25E-30 | 1.73E-28 |

|         |          |          |          |          |          |
|---------|----------|----------|----------|----------|----------|
| HNF4G   | 0.168596 | 2.078447 | 3.623867 | 6.50E-26 | 8.43E-25 |
| HTR3A   | 0.053751 | 3.456098 | 6.006716 | 5.86E-28 | 1.06E-26 |
| HTR3C   | 1.719445 | 0.082687 | -4.37814 | 2.56E-33 | 2.44E-31 |
| IL12RB2 | 0.118666 | 0.367806 | 1.632032 | 1.48E-06 | 2.68E-06 |
| IL17RD  | 0.352581 | 0.928071 | 1.396282 | 1.06E-11 | 3.03E-11 |
| IL18R1  | 3.344257 | 1.348028 | -1.31084 | 3.35E-14 | 1.20E-13 |
| IL1RL1  | 9.333198 | 1.435899 | -2.70042 | 1.88E-24 | 1.97E-23 |
| IL1RL2  | 0.25857  | 1.424422 | 2.461748 | 8.21E-27 | 1.22E-25 |
| IL20RA  | 5.973713 | 2.011518 | -1.57034 | 6.79E-22 | 5.27E-21 |
| IL20RB  | 0.27396  | 4.214733 | 3.943402 | 3.21E-17 | 1.53E-16 |
| IL22RA2 | 0.03959  | 0.58367  | 3.881926 | 5.95E-24 | 5.87E-23 |
| IL2RA   | 1.207109 | 3.618514 | 1.583842 | 2.09E-14 | 7.64E-14 |
| IL31RA  | 0.04859  | 0.891306 | 4.197181 | 6.68E-15 | 2.55E-14 |
| IL3RA   | 19.35249 | 6.591672 | -1.5538  | 5.83E-32 | 2.87E-30 |
| IL5RA   | 1.45171  | 0.37951  | -1.93554 | 1.28E-21 | 9.65E-21 |
| LEPR    | 6.491099 | 1.984133 | -1.70995 | 2.88E-29 | 6.89E-28 |
| LGR4    | 1.731152 | 12.40608 | 2.841243 | 2.83E-33 | 2.63E-31 |
| LIFR    | 17.34583 | 6.455245 | -1.42605 | 5.24E-24 | 5.20E-23 |
| MC1R    | 0.453179 | 1.118391 | 1.30327  | 1.95E-15 | 7.84E-15 |
| MCHR1   | 0.073347 | 0.323986 | 2.143121 | 1.94E-16 | 8.58E-16 |
| MET     | 17.25154 | 46.3165  | 1.424801 | 0.00013  | 0.000198 |
| NPR1    | 15.71264 | 2.851762 | -2.462   | 2.40E-33 | 2.38E-31 |
| NPR3    | 6.926213 | 2.198646 | -1.65545 | 6.84E-22 | 5.31E-21 |
| NR2F6   | 11.24739 | 23.73529 | 1.077443 | 1.40E-22 | 1.18E-21 |
| NR4A1   | 54.33046 | 17.43632 | -1.63967 | 1.87E-16 | 8.31E-16 |
| NR4A3   | 10.51354 | 2.472052 | -2.08847 | 3.04E-17 | 1.45E-16 |
| NR5A2   | 1.163748 | 0.577159 | -1.01174 | 1.22E-08 | 2.66E-08 |
| OPRD1   | 0.045166 | 0.250647 | 2.472353 | 1.51E-05 | 2.51E-05 |
| OSMR    | 16.43874 | 33.54939 | 1.029187 | 1.51E-12 | 4.69E-12 |

|           |          |          |          |          |          |
|-----------|----------|----------|----------|----------|----------|
| PGR       | 0.586146 | 0.202774 | -1.53139 | 3.29E-25 | 3.82E-24 |
| PTGER4    | 10.43943 | 3.915182 | -1.41489 | 5.99E-29 | 1.35E-27 |
| PTGFR     | 1.749177 | 0.864844 | -1.01616 | 2.91E-23 | 2.65E-22 |
| PTH1R     | 3.180508 | 0.944785 | -1.7512  | 3.13E-29 | 7.42E-28 |
| RXFP1     | 1.791    | 0.233078 | -2.94188 | 1.09E-32 | 7.44E-31 |
| RXRG      | 2.490992 | 0.535381 | -2.21808 | 1.06E-28 | 2.26E-27 |
| S1PR1     | 51.13113 | 7.960642 | -2.68325 | 3.93E-35 | 1.85E-32 |
| SSTR1     | 4.69243  | 1.094114 | -2.10057 | 1.18E-26 | 1.71E-25 |
| SSTR2     | 0.166012 | 0.359956 | 1.116538 | 2.02E-06 | 3.63E-06 |
| TEK       | 21.01197 | 2.463381 | -3.0925  | 3.22E-35 | 1.59E-32 |
| TGFBR2    | 116.1315 | 40.60868 | -1.5159  | 7.55E-34 | 9.82E-32 |
| TGFBR3    | 10.69424 | 2.056042 | -2.37889 | 1.69E-32 | 1.08E-30 |
| TIE1      | 14.52682 | 4.059272 | -1.83943 | 9.90E-32 | 4.50E-30 |
| TNFRSF11A | 0.496484 | 1.257371 | 1.340591 | 1.22E-12 | 3.82E-12 |
| TNFRSF13C | 0.738838 | 1.5912   | 1.106785 | 3.62E-13 | 1.19E-12 |
| TNFRSF17  | 0.966901 | 3.862109 | 1.997949 | 5.76E-12 | 1.69E-11 |
| TNFRSF18  | 0.954042 | 6.548463 | 2.779032 | 1.77E-23 | 1.65E-22 |
| TNFRSF21  | 13.88858 | 60.25666 | 2.117221 | 3.69E-31 | 1.44E-29 |
| TNFRSF25  | 1.011619 | 4.172716 | 2.044321 | 2.96E-20 | 1.93E-19 |
| TNFRSF9   | 0.447006 | 1.305416 | 1.546145 | 3.71E-11 | 1.01E-10 |
| TSHR      | 0.026274 | 0.250817 | 3.254956 | 5.56E-17 | 2.59E-16 |
| TUBB3     | 0.068728 | 2.033853 | 4.887168 | 4.81E-33 | 3.91E-31 |
| VIPR1     | 19.6326  | 2.312036 | -3.08602 | 3.42E-29 | 8.05E-28 |
| ICAM2     | 8.860958 | 3.665395 | -1.27349 | 2.95E-27 | 4.67E-26 |
| ITGAL     | 13.57204 | 6.574239 | -1.04574 | 2.62E-19 | 1.54E-18 |
| PAK1      | 5.985777 | 14.75736 | 1.301824 | 1.99E-31 | 8.25E-30 |
| TYROBP    | 225.4782 | 89.20492 | -1.33779 | 3.66E-24 | 3.69E-23 |
| FCGR3A    | 84.5669  | 39.00172 | -1.11656 | 8.36E-20 | 5.18E-19 |
| FCGR3B    | 4.1118   | 0.910605 | -2.17487 | 4.07E-18 | 2.12E-17 |



|         |          |          |          |          |          |
|---------|----------|----------|----------|----------|----------|
| SHC3    | 3.220747 | 1.008394 | -1.67534 | 1.43E-25 | 1.74E-24 |
| CD244   | 1.764187 | 0.773247 | -1.19    | 1.64E-17 | 8.02E-17 |
| SH2D1B  | 0.92815  | 0.291014 | -1.67327 | 2.77E-22 | 2.25E-21 |
| PRF1    | 15.13223 | 6.87434  | -1.13833 | 6.67E-16 | 2.81E-15 |
| CTLA4   | 0.97538  | 2.222658 | 1.188249 | 2.14E-09 | 4.97E-09 |
| CBLC    | 1.350501 | 13.40632 | 3.311347 | 3.03E-30 | 9.16E-29 |
| CDK4    | 13.1653  | 28.25833 | 1.101936 | 7.45E-22 | 5.75E-21 |
| PDK1    | 0.666273 | 2.481857 | 1.897234 | 1.33E-30 | 4.49E-29 |
| PRKCQ   | 4.268511 | 1.602126 | -1.41374 | 3.24E-27 | 5.09E-26 |
| TRAV1-1 | 0.146174 | 0.294183 | 1.009031 | 0.002708 | 0.003636 |
| TRGJP2  | 5.330452 | 1.223145 | -2.12366 | 3.13E-22 | 2.54E-21 |

---
